# Supplementary material
Source: PubMed Central journal article supplement (PMC298720)

**A**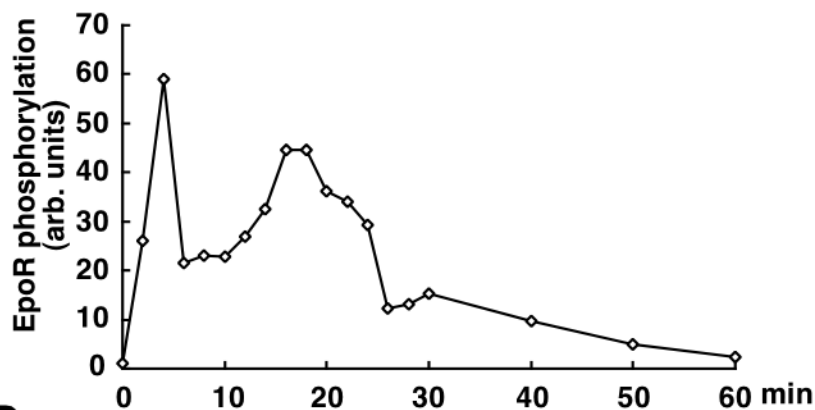**B**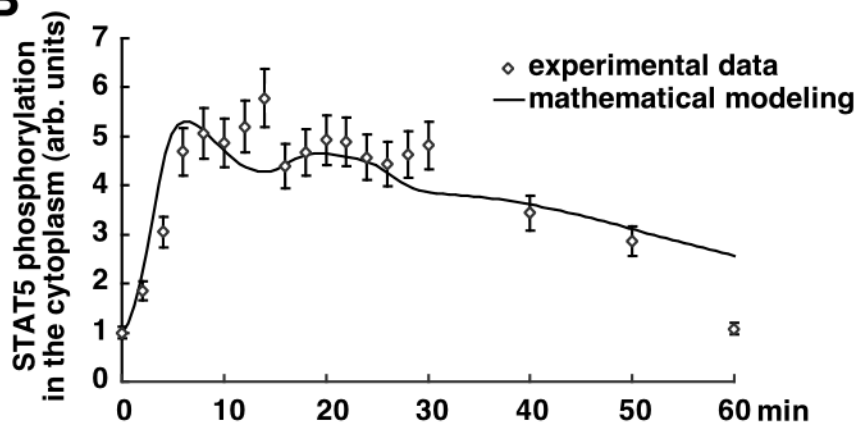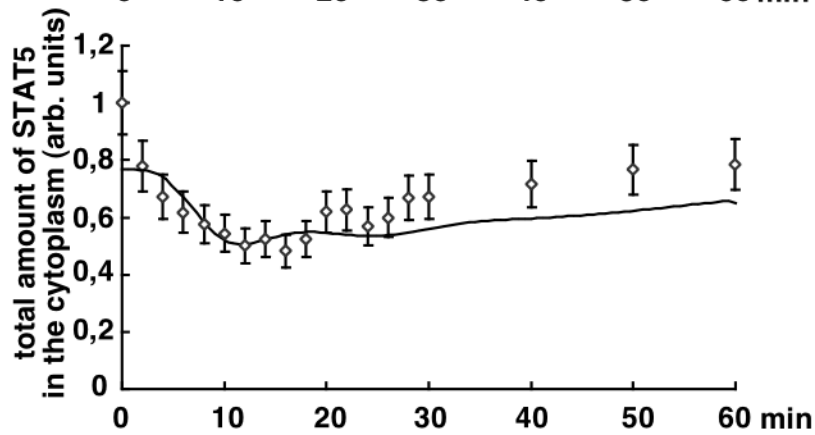

Supplement: pnas_0237333100_5.pdf [file pnas_0237333100_5.pdf]

**A**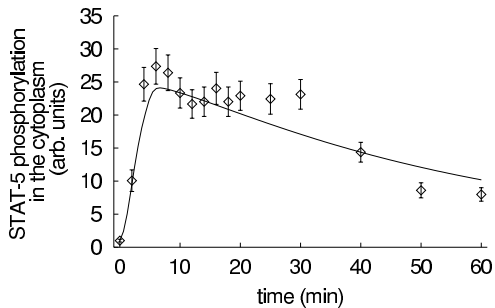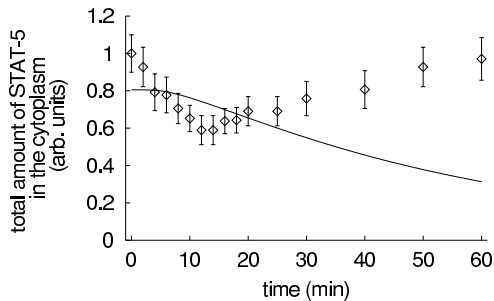**B**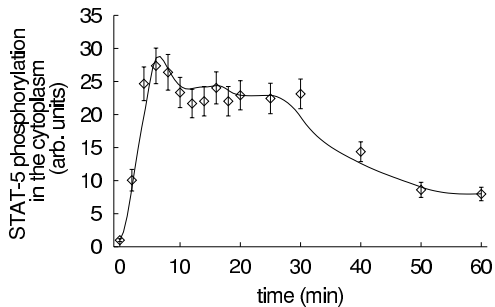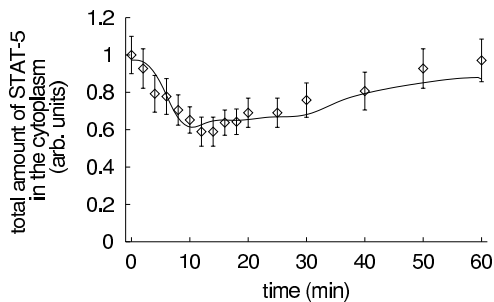**C**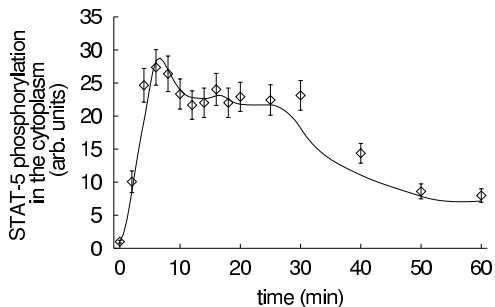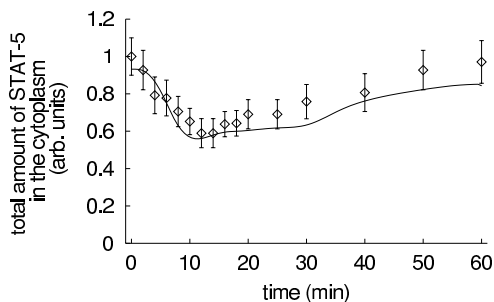

Supplement: pnas_0237333100_7.pdf [file pnas_0237333100_7.pdf]
